# Supplementary material for: The Liver Microbiome Is Implicated in Cancer Prognosis and Modulated by Alcohol and Hepatitis B
Source: MDPI journal article supplement (doi:10.3390/cancers12061642), 2020-06-21
Supplement: s1 [file s1]

## Supplementary Materials: The Liver Microbiome Is Implicated in Cancer Prognosis and Modulated by Alcohol and Hepatitis B

Jaideep Chakladar, Lindsay M. Wong, Selena Z. Kuo, Wei Tse Li, Michael Andrew Yu,  
Eric Y. Chang, Xiao Qi Wang and Weg M. Ongkeko

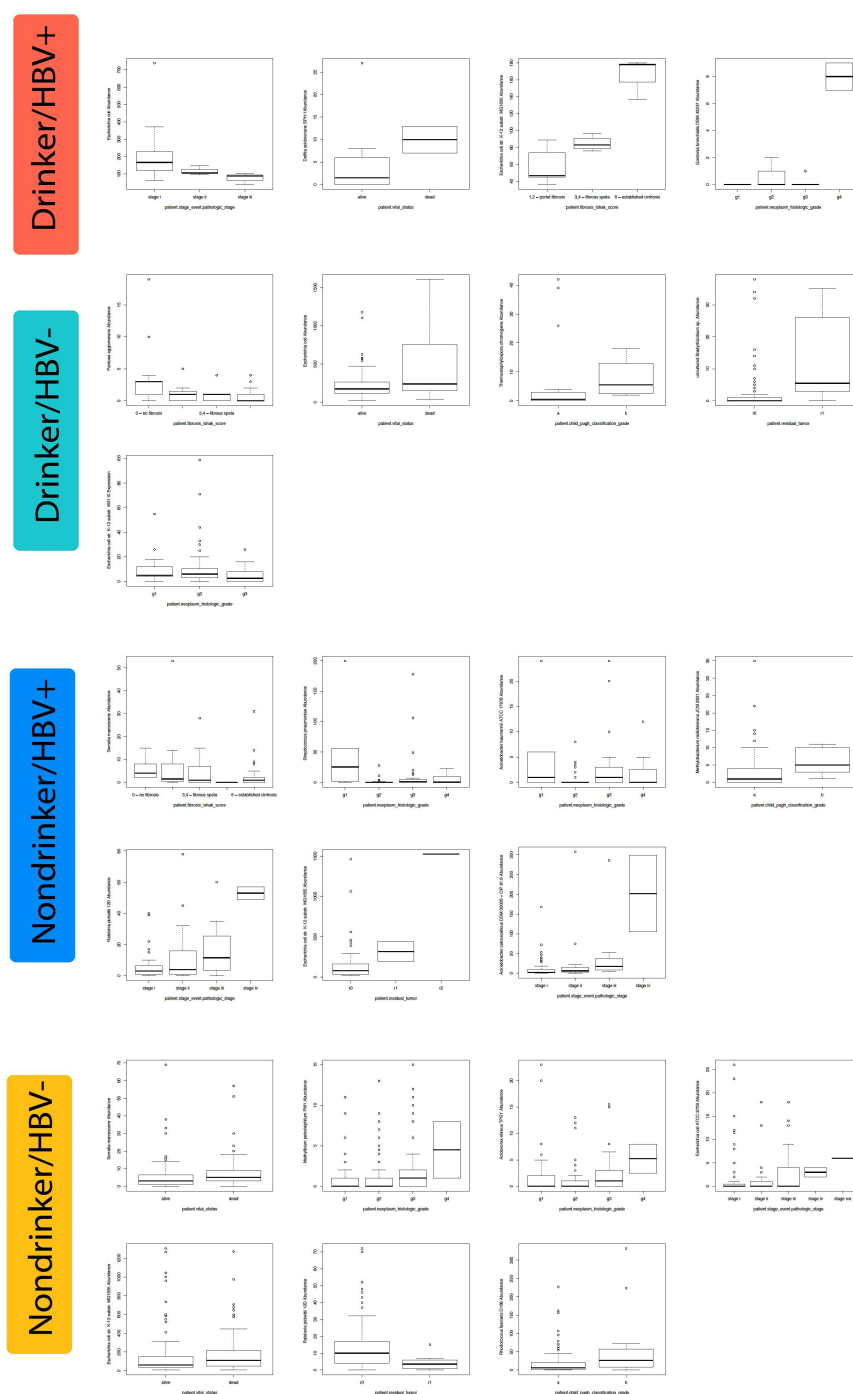

**Figure S1:** Kruskal wallis box plots for clinical variable correlations. A visualization of the top kruskal-wallis box plots comparing clinical variables to microbial abundance for each of the four comparisons. Clinical variables plots correspond to the  $p$ -values plotted in Figure 4.

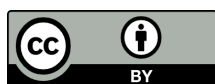

© 2020 by the authors. Licensee MDPI, Basel, Switzerland. This article is an open access article distributed under the terms and conditions of the Creative Commons Attribution (CC BY) license (<http://creativecommons.org/licenses/by/4.0/>).
